# Supplementary material
Source: PubMed Central journal article supplement (PMC5882112)
Supplement: mic-163-1292-s001.pdf [file mic-163-1292-s001.pdf]

Table S1. Oligonucleotide primers used in this study. K, R, W, and Y are based on the IUPAC code, where K stands for T/G, R stands for A/G, W stands for A/T, and Y stands for C/T.

| <b>Primer name</b> | <b>Sequence (5'–3')</b>                  |
|--------------------|------------------------------------------|
| 1pr2ie             | CTTATACTTCGGCTCGATGCGTGGTGTATGCACC       |
| 1pr2yk             | CGCTGATTTGCTCTTATAGCGTGGTGTATGCACC       |
| 1Pr3IE             | GGTGCATCACCACGCATCGAGCCGAAGTATAAG        |
| 1Pr3YK             | GGTGCATCACCACGCTATAAGAGCAAATCAGCG        |
| 4Pr3               | GGTGCATCACCACGCATTACAAGTCAACACTC         |
| 1Pr4               | ATTCATGACTCCGTATTCTTTATTATTTAC           |
| 3PrA2162c          | TGCTCTCGGAACCAAGTC                       |
| 4pr2               | GAGTGTTGACTTGTAATGCGTGGTGTATGCACC        |
| 5PrA2162280        | GTTGAATGATGGTGAACGTG                     |
| a13AleI            | TTTTCCACCGTAGTGTATTATTACCTGTG            |
| a15pTG             | CGAAATCATCAAATTTTCCCATTTTGAGTGCCTCC      |
| a25pTG             | CGAAATCATCAAATTTTGCCATTTTGAGTGCCTCC      |
| a43AleI            | TGTACACTAAAGTGGATTTATTGACCCTTTAAT        |
| i5pTG              | CTTTTTATTAATACTACTATTCTTCATTTTGAGTGCCTCC |
| iAleIb             | TTTCACTTTTGTGACCCATACTAATC               |
| lanA14             | GTATTCTAGATTATTTACCTGTGATATGGC           |
| lanA44             | CTAATCTAGATTTATTGACCCTTTAATTTACATGTG     |
| lanC340            | GWRWKGSWTGGTGTATG                        |
| NisA-BspHF         | CACTCATCATGAGTACAAAAGATTTTAAC            |
| NisA-BspHR         | ACTATCTCATGATTTGGTTATTTGCT               |
| nzrevcpJAZZ        | AAATGGTCAGTTAATCAGTTCT                   |
| p181               | GCGAAGATAACAGTGACTCTA                    |
| p54                | CGGCTCTGATTAATTCTGAAG                    |
| pIL253F            | CGACAATGATTGTATTTGC                      |
| pIL253R            | TAGTTCTTGTGGTTACGTGG                     |
| pJAZZf             | TGATTACATTTGCGGCCTAAC                    |
| pr1                | ATTCATGAGTACAAAAGATTTTAACTTGG            |
| pTG262-F           | GGTCGACTCTAGAGGATCC                      |
| pTG262-R           | GCCGGAAAGAGCGAAAATG                      |
| pTGA13             | GGAGGCACTCAAATGGGAAAATTTGATGATTTCCG      |
| pTGA23             | GGAGGCACTCAAATGGCAAATTTGATGATTTCCG       |
| pTGI3              | GGAGGCACTCAAATGGGAAAATTTGATGATTTCCG      |
| reverse            | AGCGGATAACAATTTACACAGGA                  |
| rlanC460           | WDYWCCWBNWARWADWCC                       |
| spI5               | GCACTCAAATGAGAAGATATTTAATAC              |
| splA1              | CGTTATCTAATACTGATCTATGG                  |
| splA2              | GATTTATTGACCCTTGCCCTCTTTCTTTTTG          |
| splA3              | AAAAGAAAGGAGGCAAGGGTCAATAAATCT           |
| splA4              | ATAATCATCTGCTCCACTC                      |
| splI3AleI          | ATTCACTTTTGTGCACTCTAGTTTCC               |
| universal          | GTTTTCCCAGTCACGACGTTGT                   |

Table S2 *B. obeum* A2-162 putative lantibiotic cluster analysis

| Gene         | Predicted function                   | GC % | Size (aa <sup>†</sup> ) | Top BlastP match (E value)                                                                           | % Identity      | Top conserved domain/superfamily (E value)                                                           |
|--------------|--------------------------------------|------|-------------------------|------------------------------------------------------------------------------------------------------|-----------------|------------------------------------------------------------------------------------------------------|
| <i>orf1</i>  | Partial transcriptional regulator    | 38.3 | 127                     | WP_005421656 transcriptional regulator, <i>B. obeum</i> (3e-78)                                      | 94 over 126 aa  | No conserved domains                                                                                 |
| <i>nsoF</i>  | Immunity                             | 34.7 | 238                     | WP_044912948 multispecies lantibiotic ABC transporter ATP-binding protein, Clostridiales (9e-118)    | 169 over 233 aa | TIGR03740, gallidermin-class lantibiotic protection ABC transporter, ATP-binding subunit (9,71e-131) |
| <i>nsoE</i>  | Immunity                             | 32.2 | 239                     | WP_065541939 lantibiotic ABC transporter permease, <i>Blautia</i> sp YL58 (7e-51)                    | 92 over 238 aa  | TIGR03732, lantibiotic protection ABC transporter permease subunit, MutE/EpiE family (3.51e-40))     |
| <i>nsoG</i>  | Immunity                             | 31.6 | 309                     | WP_029471090 hypothetical protein, Clostridiales bacterium VE202-06 (2e-42)                          | 95 over 247 aa  | TIGR03733, lantibiotic protection ABC transporter permease subunit, MutG family (4.39e-30)           |
| <i>nsoI</i>  | Immunity                             | 30.2 | 297                     | WP_040329118 hypothetical protein, <i>Clostridium ihumii</i> (2e-50)                                 | 98 over 260 aa  | No conserved domains                                                                                 |
| <i>nsoR1</i> | Response regulator                   | 34.5 | 221                     | SCH54198 <i>Staphylococcus</i> exoprotein expression protein R, uncultured <i>Blautia</i> sp (3e-82) | 120 over 185 aa | COG0745, DNA binding response regulator, OmpR family (1.37e-62)                                      |
| <i>nsoK1</i> | Signal transduction histidine kinase | 30.1 | 452                     | CBL21418 signal transduction histidine kinase, <i>Ruminococcus</i> sp. SR1/5 (2e-125)                | 201 over 451 aa | COG0642, Signal transduction histidine kinase (5.07e-39)                                             |
| <i>nsoA1</i> | Lantibiotic prepeptide               | 46.2 | 56                      | WP_069329679 lantibiotic nisin A, <i>Paenibacillus</i> sp TI45-13ar (9e-17)                          | 60 over 55 aa   | TIGR03731, lantibiotic, gallidermin/nisin family (1.15e-07)                                          |
| <i>nsoA2</i> | Lantibiotic prepeptide               | 45.6 | 56                      | WP_06932967 lantibiotic nisin A, <i>Paenibacillus</i> sp TI45-13ar (9e-17)                           | 62 over 55 aa   | TIGR03731, lantibiotic, gallidermin/nisin family (7.39e-08)                                          |
| <i>nsoA3</i> | Lantibiotic prepeptide               | 45.0 | 56                      | WP_069329679 lantibiotic nisin A, <i>Paenibacillus</i> sp TI45-13ar (9e-17)                          | 62 over 55 aa   | TIGR03731, lantibiotic, gallidermin/nisin family (7.39e-08)                                          |

|              |                                      |      |      |                                                                                                                 |                     |                                                                                                              |
|--------------|--------------------------------------|------|------|-----------------------------------------------------------------------------------------------------------------|---------------------|--------------------------------------------------------------------------------------------------------------|
| <i>nsoA4</i> | Lantibiotic prepeptide               | 32.8 | 57   | YP_001124394 lantibiotic antimicrobial precursor peptide, <i>Geobacillus thermodenitrificans</i> NG80-2 (7e-06) | 59 over<br>41 aa    | cl03420, Gallidermin super family (4.59e-04)                                                                 |
| <i>nsoR2</i> | Response regulator                   | 29.4 | 234  | WP_065541933 DNA-binding response regulator, <i>Blautia</i> sp YL58 (3e-108)                                    | 157 over<br>220 aa  | COG0745, DNA binding response regulator, OmpR family (4.47e-65)                                              |
| <i>nsoK2</i> | Signal transduction histidine kinase | 28.8 | 452  | WP_065541932 sensor histidine kinase, <i>Blautia</i> sp YL58 (1e-153)                                           | 221 over<br>451 aa  | COG0642, Signal transduction histidine kinase (1.84e-24)                                                     |
| <i>nsoB</i>  | Lantibiotic dehydratase              | 31.0 | 1019 | WP_069329682 subtilin biosynthesis protein SpaB, <i>Paenibacillus</i> sp TI45-13ar (e0.0)                       | 414 over<br>1023 aa | pfam04738, Lantibiotic dehydratase, C terminus (8.94e-116)                                                   |
| <i>nsoT</i>  | Lantibiotic transporter              | 30.2 | 603  | WP_065541930 ABC transporter ATP-binding protein, <i>Blautia</i> sp YL58 (e0.0)                                 | 390 over<br>600 aa  | COG1132, ABC-type multidrug transport system, ATPase and permease components [Defense mechanisms] (1.06e-83) |
| <i>nsoC</i>  | Lantibiotic cyclase                  | 32.8 | 448  | WP_065541929 Hypothetical protein, <i>Blautia</i> sp YL58 (1e-177)                                              | 236 over<br>412 aa  | cd04793, cyclases involved in the biosynthesis of lantibiotics (3.26e-116)                                   |
| <i>orf2</i>  | Putative transposase                 | 37.4 | 128  | SCH51517 Uncharacterised protein, uncultured <i>Eubacterium</i> sp. (1e-77)                                     | 92 over<br>121 aa   | No conserved domains                                                                                         |
| <i>orf3</i>  | Partial transposase                  | 37.7 | 46   | CUO47820 transposase, <i>Doria longicatena</i> (4e-14)                                                          | 80 over<br>44 aa    | No conserved domains                                                                                         |
| <i>orf4</i>  | Partial transposase                  | 42.0 | 69   | CUP17848 transposase, <i>Blautia wexlerae</i> (2e-21)                                                           | 95 over<br>44 aa    | No conserved domains                                                                                         |
| <i>orf5</i>  | Partial DNA binding protein          | 36.1 | 71   | WP_065547559 transcriptional regulator, <i>Lachnoclostridium</i> sp. YL32 (7e-40)                               | 96 over<br>71 aa    | cd00093, HTH-XRE helix turn helix XRE-family like proteins (9.61e-14)                                        |
| <i>orf6</i>  | Partial DNA binding                  | 30.8 | 52   | WP_065547559 transcriptional regulator,                                                                         | 85 over             | No conserved domains                                                                                         |

|             |                                |      |     |                                                                                       |                |                                                                      |
|-------------|--------------------------------|------|-----|---------------------------------------------------------------------------------------|----------------|----------------------------------------------------------------------|
|             | protein                        |      |     | <i>Lachnospirillum</i> sp. YL32 (3e-21)                                               | 52 aa          |                                                                      |
| <i>orf7</i> | DNA binding response regulator | 32.4 | 242 | WP_065547558 DNA binding response regulator, <i>Lachnospirillum</i> sp. YL32 (1e-163) | 91 over 241 aa | COG3279, DNA-binding response regulator, LytR/AlgR family (9.14e-36) |
| <i>orf8</i> | sensory histidine kinase       | 34.6 | 130 | SCH93137 sensory histidine kinase, uncultured <i>Ruminococcus</i> sp. (5e-45)         | 67 over 129 aa | No conserved domains                                                 |

---

† aa, amino acids
